# Supplementary material
Source: PubMed Central journal article supplement (PMC2808268)
Supplement: M900343-MCP200_1.pdf [file M900343-MCP200_1.pdf]

## Supplementary materials for

### Proteomic Analysis Reveals Overlapping Functions of Clustered Protocadherins

Meng-Hsuan Han<sup>1</sup>, Chengyi Lin, Shuxia Meng and Xiaozhong Wang\*

Department of Biochemistry, Molecular Biology and Cell Biology,

Northwestern University, Evanston, Illinois 60208, USA.

#### Figure legend for supplementary figures

**Figure S1.** Optimization of the affinity-purification procedure for Pcdh- $\gamma$  protein complexes from the mouse brains. **A.** The Coomassie blue staining of sucrose gradient fractions on a SDS-PAGE gel showed that overall protein complexity decreased in Pcdh- $\gamma$  peak fractions (7-10) that were used for final affinity-purification. **B.** Comparison of different affinity-resins by SPYRO Ruby staining and anti-Pcdh- $\gamma$  western blot analysis. The fractions (5-6) from the sucrose gradient (in A) were used for immunoprecipitation. Vector: goat anti-GFP agarose (MB-0732); MBL, rat anti-GFP agarose (D153-8). Vector resins have significantly higher background in SPYRO Ruby staining compared to MBL resins even though both resins can specifically bind to Pcdh- $\gamma$ -GFP (western blot on the left). Note that some background bands were still seen from the negative control (wild type) using MBL resins when fractions 5-6 of the sucrose gradient were used for purification. **C.** A western blot shows the input, flow-through and elute of an affinity purification of Pcdh- $\gamma$ -GFP using the peak sucrose fractions (7-10) from *Pcdh- $\gamma$ <sup>fusg/fusg</sup>* mouse brains using MBL anti-GFP resins. Equal amount of wild-type brain lysates were used as the negative control. **D.** The SPYRO Ruby staining of the eluted proteins from C showing the specificity of affinity-purification using both Pcdh- $\gamma$ -GFP peak fractions and MBL anti-GFP resins.

**Figure S2.** Western blot analysis of Pcdh- $\gamma$  associated proteins in the total brain lysates. Total brain lysates from the P0 brains of both wild type and *Pcdh- $\gamma$ <sup>del/del</sup>* mice were subjected to SDS-PAGE and western blot analysis using specific antibodies. No decrease of CamKII- $\alpha$ , - $\beta$ , - $\gamma$  and SNIP protein levels was found in *Pcdh- $\gamma$ <sup>del/del</sup>* samples.  $\beta$ -tubulin served as a loading control. “\*” marks a non-specific band detected by anti-CamKII- $\alpha$  antibodies.

**Figure S3.** High-magnification active-caspase-3 staining of chicken spinal cords. The same images in Figure 7D are shown in a higher magnification for easy visualization of caspase-3 positive cells.

## Supplementary Figure S1

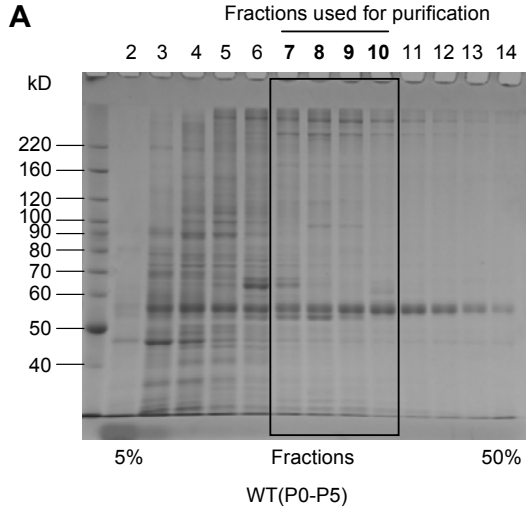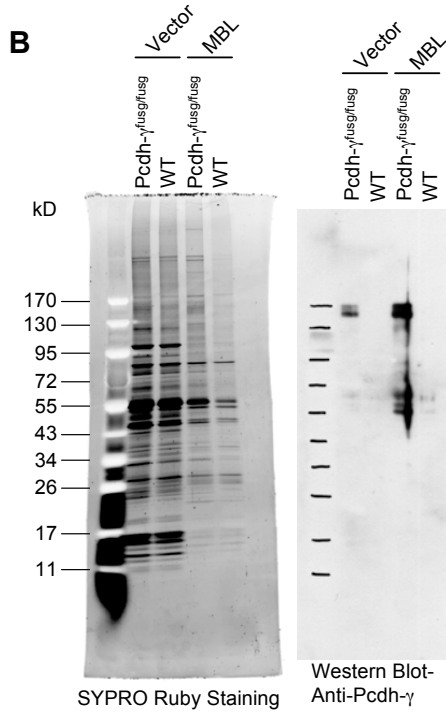

IP: Fraction 5-6

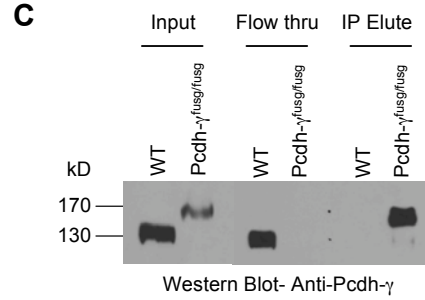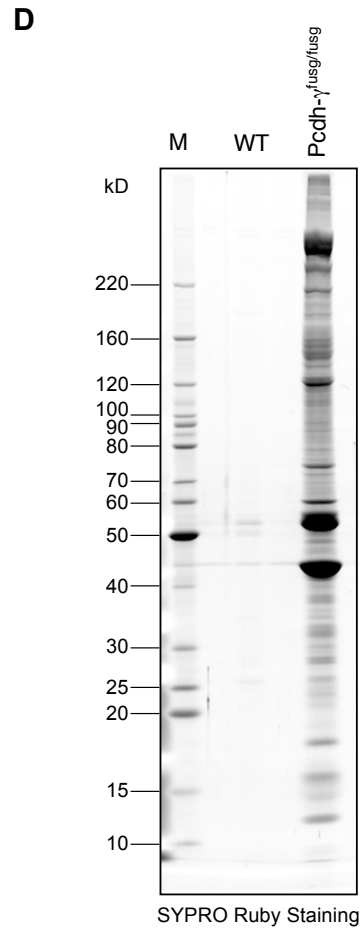

IP: Fraction 7-10

## Supplementary Figure S2

Total brain lysates (P0)

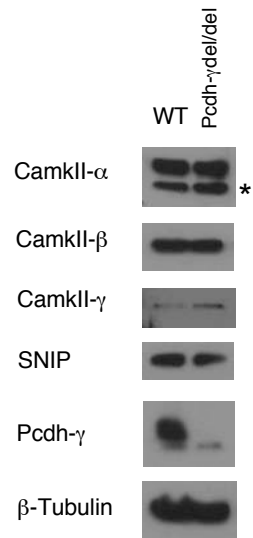

Supplementary Figure S3

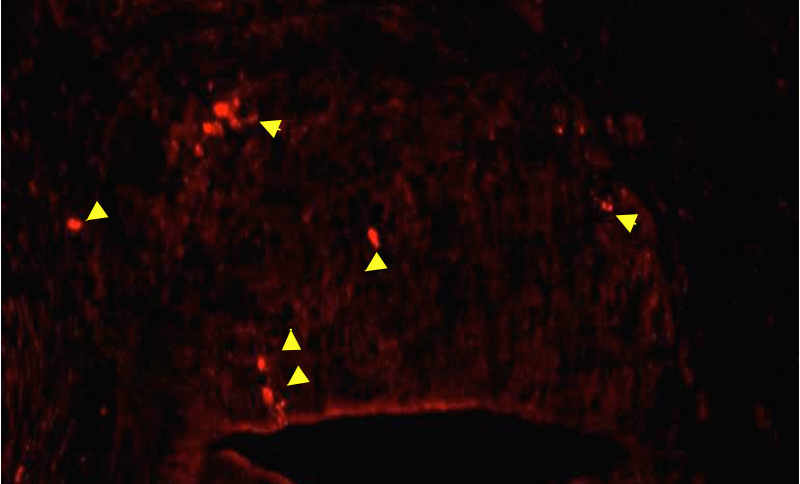

Pcdh- $\alpha$ -si1 + Pcdh- $\gamma$ -si1

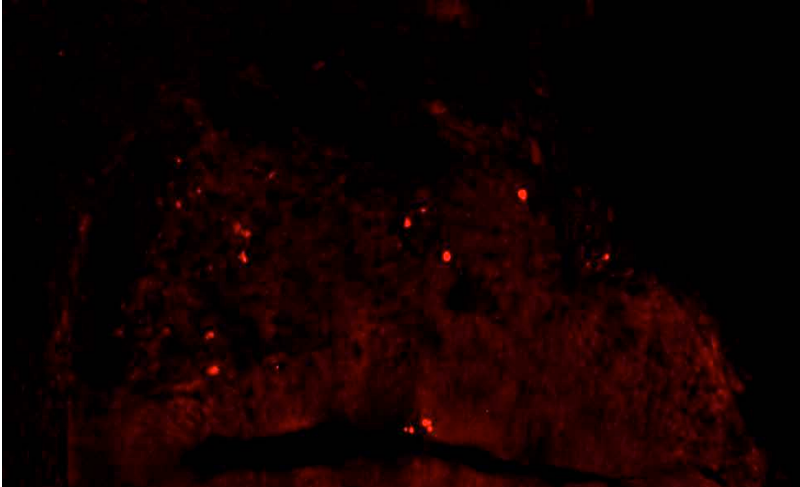

Pcdh- $\alpha$ -si22 + Pcdh- $\gamma$ -si3

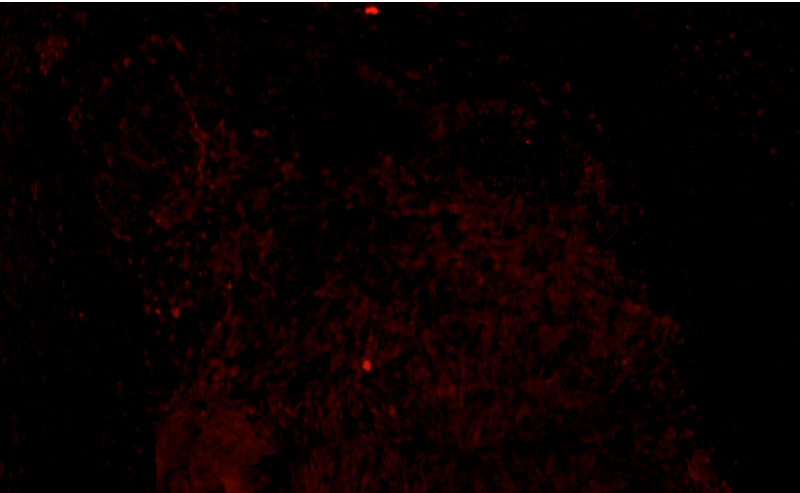

Luc-si1 + GFP-si

**Supplementary Table S1. Complete list of the MS identified proteins in Pcdh- $\gamma$  complexes**

| No.                 | Protein                                                                                      | Gene Name     | Accession Number             | MW (kDa) | Unique Peptides | Percent Coverage | Protein ID probability |
|---------------------|----------------------------------------------------------------------------------------------|---------------|------------------------------|----------|-----------------|------------------|------------------------|
| <b>Cytoskeleton</b> |                                                                                              |               |                              |          |                 |                  |                        |
| 1*                  | Actin, beta, cytoplasmic<br>Actin, gamma, cytoplasmic 1                                      | Actb<br>Actg1 | gi 6671509<br>gi 6752954     | 42       | 3               | 10               | 100                    |
| 2                   | Actin-binding LIM protein 1                                                                  | Ablim1        | gi 38016178                  | 97       | 4               | 5                | 100                    |
| 3                   | Ankyrin 2, brain isoform 2                                                                   | Ank2          | gi 77681962                  | 117      | 3               | 4                | 100                    |
| 4                   | Capping protein (actin filament) muscle Z-line, beta isoform b                               | Capzb         | gi 6753262                   | 31       | 4               | 15               | 100                    |
| 5                   | CLASP1                                                                                       | Clasp1        | gi 124486879                 | 169      | 3               | 2                | 100                    |
| 6*                  | CLIP-associating protein CLASP2 isoform a<br>CLIP-associating protein CLASP2 isoform b       | Clasp2        | gi 126506304<br>gi 126506306 | 141      | 2               | 2                | 100                    |
| 7                   | Drebrin 1                                                                                    | Dbn1          | gi 34328251                  | 72       | 14              | 20               | 100                    |
| 8                   | Internexin neuronal intermediate filament protein, alpha                                     | Ina           | gi 34328368                  | 55       | 21              | 41               | 100                    |
| 9                   | Lamin B2                                                                                     | Lmnb2         | gi 113195686                 | 67       | 10              | 19               | 100                    |
| 10                  | Microtubule-associated protein 1 B                                                           | Mtap1b        | gi 6678946                   | 270      | 2               | 1                | 100                    |
| 11*                 | Microtubule-associated protein tau isoform a<br>Microtubule-associated protein tau isoform b | Mapt          | gi 84370347<br>gi 84370355   | 45<br>39 | 4               | 8<br>10          | 100                    |
| 12                  | Myosin heavy chain 10, non-muscle                                                            | Myh10         | gi 33598964                  | 229      | 64              | 29               | 100                    |
| 13                  | Myosin IB                                                                                    | Myo1b         | gi 86990450                  | 129      | 7               | 6                | 100                    |
| 14                  | Myosin Va                                                                                    | Myo5a         | gi 115511052                 | 216      | 46              | 24               | 100                    |
| 15                  | Myosin Vb                                                                                    | Myo5b         | gi 46399202                  | 211      | 3               | 2                | 100                    |
| 16                  | Myosin XVIIIa                                                                                | Myo18a        | gi 22094119                  | 231      | 2               | 1                | 100                    |
| 17                  | Myosin, heavy polypeptide 14                                                                 | Myh14         | gi 29336026                  | 228      | 5               | 2                | 100                    |
| 18                  | Myosin, heavy polypeptide 9, non-muscle isoform 1                                            | Myh9          | gi 114326446                 | 226      | 23              | 12               | 100                    |

| No.                  | Protein                                                           | Gene Name | Accession Number | MW (kDa) | Unique Peptides | Percent Coverage | Protein ID probability |
|----------------------|-------------------------------------------------------------------|-----------|------------------|----------|-----------------|------------------|------------------------|
| 19*                  | Myosin, light polypeptide 6B                                      | Myl6b     | gi 26986555      | 23       | 2               | 9                | 96                     |
|                      | Myosin, light polypeptide 6, alkali, smooth muscle and non-muscle | Myl6      | gi 33620739      | 17       |                 | 13               |                        |
| 20                   | Neurofilament 3, medium                                           | Nefm      | gi 112363107     | 96       | 7               | 9                | 100                    |
| 21                   | Neurofilament, light polypeptide                                  | Nefl      | gi 39204499      | 62       | 23              | 40               | 100                    |
| 22                   | Spectrin alpha 2                                                  | Spna2     | gi 115496850     | 285      | 48              | 24               | 100                    |
| 23                   | Spectrin beta 1                                                   | Spnb1     | gi 84490394      | 268      | 2               | 1                | 100                    |
| 24                   | Spectrin beta 2 isoform 1                                         | Spnb2     | gi 117938332     | 274      | 53              | 29               | 100                    |
| 25                   | Spectrin beta 3                                                   | Spnb3     | gi 55926127      | 271      | 10              | 6                | 100                    |
| 26                   | Tubulin, alpha 1                                                  | Tuba1a    | gi 6755901       | 50       | 22              | 61               | 100                    |
| 27                   | Tubulin, alpha 1a                                                 | Tuba3a    | gi 6678465       | 50       | 6               | 15               | 100                    |
| 28                   | Tubulin, alpha 1B                                                 | Tuba1b    | gi 34740335      | 50       | 7               | 23               | 100                    |
| 29                   | Tubulin, alpha 1C                                                 | Tuba1c    | gi 6678469       | 50       | 22              | 62               | 100                    |
| 30                   | Tubulin, alpha 4                                                  | Tuba4a    | gi 6678467       | 50       | 19              | 55               | 100                    |
| 31                   | Tubulin, beta                                                     | Tubb2b    | gi 21746161      | 50       | 26              | 68               | 100                    |
| 32                   | Tubulin, beta 2                                                   | Tubb2a    | gi 33859488      | 50       | 28              | 68               | 100                    |
| 33                   | Tubulin, beta 2c                                                  | Tubb2c    | gi 22165384      | 50       | 22              | 52               | 100                    |
| 34                   | Tubulin, beta 3                                                   | Tubb3     | gi 12963615      | 50       | 26              | 54               | 100                    |
| 35                   | Tubulin, beta 4                                                   | Tubb4     | gi 31981939      | 50       | 20              | 47               | 100                    |
| 36                   | Tubulin, beta 5                                                   | Tubb5     | gi 7106439       | 50       | 23              | 55               | 100                    |
| 37                   | Tubulin, beta 6                                                   | Tubb6     | gi 27754056      | 50       | 16              | 38               | 100                    |
| 38                   | Vimentin                                                          | Vim       | gi 31982755      | 54       | 16              | 32               | 100                    |
| <b>Cell adhesion</b> |                                                                   |           |                  |          |                 |                  |                        |
| 39                   | Cadherin 4 (R-cadherin)                                           | Cdh4      | gi 6753376       | 100      | 5               | 6                | 100                    |

| No. | Protein                                   | Gene Name | Accession Number | MW (kDa) | Unique Peptides | Percent Coverage | Protein ID probability |
|-----|-------------------------------------------|-----------|------------------|----------|-----------------|------------------|------------------------|
| 40  | Catenin, alpha 1                          | Ctnna1    | gi 6753294       | 100      | 2               | 3                | 100                    |
| 41  | Catenin, alpha 2 isoform 2                | Ctnna2    | gi 6753296       | 105      | 7               | 8                | 100                    |
| 42  | Catenin, beta 1                           | Ctnnb1    | gi 6671684       | 85       | 7               | 10               | 100                    |
| 43  | Limbic system-associated membrane protein | Lsamp     | gi 30425330      | 38       | 2               | 8                | 98                     |
| 44  | Protocadherin 17                          | Pcdh17    | gi 62988326      | 126      | 2               | 3                | 100                    |
| 45  | Protocadherin alpha 11                    | Pcdha11   | gi 23956048      | 103      | 3               | 3                | 100                    |
| 46  | Protocadherin alpha 12                    | Pcdha12   | gi 21426883      | 103      | 4               | 5                | 100                    |
| 47  | Protocadherin alpha 2                     | Pcdha2    | gi 51092277      | 102      | 2               | 2                | 99                     |
| 48  | Protocadherin alpha 3                     | Pcdha3    | gi 21426881      | 102      | 2               | 2                | 98                     |
| 49  | Protocadherin alpha 5                     | Pcdha5    | gi 20137002      | 102      | 2               | 2                | 99                     |
| 50  | Protocadherin alpha 7                     | Pcdha7    | gi 23956046      | 101      | 2               | 2                | 100                    |
| 51  | Protocadherin alpha 9                     | Pcdha9    | gi 21426885      | 107      | 2               | 2                | 100                    |
| 52  | Protocadherin alpha subfamily C, 2        | Pcdhac2   | gi 51092283      | 109      | 2               | 3                | 98                     |
| 53  | Protocadherin beta 14                     | Pcdhb14   | gi 32189405      | 87       | 2               | 3                | 100                    |
| 54  | Protocadherin beta 17                     | Pcdhb17   | gi 32308225      | 88       | 3               | 5                | 100                    |
| 55  | Protocadherin beta 18                     | Pcdhb18   | gi 18087797      | 87       | 3               | 4                | 100                    |
| 56  | Protocadherin beta 19                     | Pcdhb19   | gi 89363034      | 88       | 3               | 5                | 100                    |
| 57  | Protocadherin beta 20                     | Pcdhb20   | gi 89994747      | 88       | 3               | 5                | 100                    |
| 58  | Protocadherin beta 22                     | Pcdhb22   | gi 32189396      | 87       | 3               | 4                | 100                    |
| 59  | Protocadherin beta 5                      | Pcdhb5    | gi 16716429      | 87       | 2               | 3                | 100                    |
| 60  | Protocadherin beta 8                      | Pcdhb8    | gi 16716433      | 85       | 2               | 2                | 98                     |
| 61  | Protocadherin gamma subfamily A, 1        | Pcdhga1   | gi 18087753      | 101      | 4               | 6                | 100                    |
| 62  | Protocadherin gamma subfamily A, 11       | Pcdhga11  | gi 18087773      | 101      | 4               | 7                | 100                    |
| 63  | Protocadherin gamma subfamily A, 12       | Pcdhga12  | gi 18087775      | 101      | 4               | 6                | 100                    |

| No.                          | Protein                                                     | Gene Name | Accession Number | MW (kDa) | Unique Peptides | Percent Coverage | Protein ID probability |
|------------------------------|-------------------------------------------------------------|-----------|------------------|----------|-----------------|------------------|------------------------|
| 64                           | Protocadherin gamma subfamily A, 3                          | Pcdhga3   | gi 18087757      | 100      | 3               | 4                | 100                    |
| 65                           | Protocadherin gamma subfamily A, 4                          | Pcdhga4   | gi 31982598      | 100      | 5               | 8                | 100                    |
| 66                           | Protocadherin gamma subfamily A, 8                          | Pcdhga8   | gi 18087767      | 101      | 2               | 3                | 100                    |
| 67                           | Protocadherin gamma subfamily A, 9                          | Pcdhga9   | gi 18087769      | 101      | 3               | 4                | 100                    |
| 68                           | Protocadherin gamma subfamily B, 4                          | Pcdhgb4   | gi 18087737      | 99       | 2               | 4                | 100                    |
| 69                           | Protocadherin gamma subfamily B, 6                          | Pcdhgb6   | gi 18087741      | 101      | 3               | 4                | 100                    |
| 70                           | Protocadherin gamma subfamily B, 8                          | Pcdhgb8   | gi 18087745      | 101      | 3               | 4                | 100                    |
| 71                           | Protocadherin gamma subfamily C, 3                          | Pcdhgc3   | gi 18087747      | 101      | 9               | 11               | 100                    |
| 72                           | Protocadherin gamma subfamily C, 4                          | Pcdhgc4   | gi 18087749      | 101      | 4               | 6                | 100                    |
| 73                           | Snap-25-interacting protein                                 | P140      | gi 116089329     | 131      | 3               | 3                | 99                     |
| <b>Trafficking/transport</b> |                                                             |           |                  |          |                 |                  |                        |
| 74                           | Adaptor protein complex AP-2, alpha 1 subunit isoform b     | Ap2a1     | gi 116256510     | 105      | 11              | 12               | 100                    |
| 75                           | Adaptor protein complex AP-2, alpha 2 subunit               | Ap2a2     | gi 40254646      | 104      | 10              | 12               | 100                    |
| 76                           | Adaptor-related protein complex 2, beta 1 subunit isoform b | Ap2b1     | gi 21313640      | 105      | 12              | 12               | 100                    |
| 77                           | ATP-binding cassette transporter sub-family A member 16     | Abca16    | gi 46369473      | 192      | 2               | 3                | 95                     |
| 78                           | ATP-binding cassette transporter sub-family A member 9      | Abca9     | gi 22267466      | 183      | 2               | 2                | 99                     |
| 79                           | Clathrin interactor 1                                       | Clint1    | gi 113865873     | 68       | 3               | 6                | 100                    |
| 80                           | Clathrin, heavy polypeptide (Hc)                            | Cltc      | gi 51491845      | 192      | 10              | 6                | 100                    |
| 81                           | EF hand domain containing 2                                 | Efhd2     | gi 31981086      | 27       | 3               | 10               | 100                    |
| 82                           | ELKS/RAB6-interacting/CAST family member 2                  | Erc2      | gi 37360977      | 116      | 9               | 9                | 100                    |
| 83*                          | FXYP domain-containing ion transport regulator 2 isoform a  | Fxyd2     | gi 16554570      | 8        | 2               | 41               | 98                     |
|                              | FXYP domain-containing ion transport regulator 2 isoform b  |           | gi 16554572      | 7        |                 | 45               |                        |



| No.              | Protein                                                         | Gene Name | Accession Number | MW (kDa) | Unique Peptides | Percent Coverage | Protein ID probability |
|------------------|-----------------------------------------------------------------|-----------|------------------|----------|-----------------|------------------|------------------------|
| 84               | Kinesin family member 2A                                        | Kif2a     | gi 6680560       | 81       | 4               | 5                | 100                    |
| 85               | Rab11-family interacting protein 2                              | Rab11fip2 | gi 75677518      | 60       | 2               | 5                | 100                    |
| 86               | Rab6-interacting protein 2 isoform 1                            | Erc1      | gi 120300971     | 128      | 3               | 3                | 100                    |
| 87               | Solute carrier family 25, member 12                             | Slc25a12  | gi 27369581      | 75       | 15              | 22               | 100                    |
| 88               | Solute carrier family 25, member 4 (Ant1)                       | Slc25a4   | gi 91680541      | 33       | 13              | 39               | 100                    |
| 89               | Solute carrier family 25, member 5 (Ant2)                       | Slc25a5   | gi 22094075      | 33       | 11              | 35               | 100                    |
| 90               | Synaptic vesicle glycoprotein 2 a                               | Sv2a      | gi 11528518      | 83       | 2               | 3                | 100                    |
| 91               | Transportin 1 isoform 1                                         | Tnpol     | gi 115385968     | 102      | 2               | 2                | 100                    |
| <b>Signaling</b> |                                                                 |           |                  |          |                 |                  |                        |
| 92               | 14-3-3 gamma                                                    | Ywhag     | gi 21464101      | 28       | 6               | 23               | 100                    |
| 93               | 14-3-3 theta                                                    | Ywhaq     | gi 6756039       | 28       | 4               | 13               | 100                    |
| 94               | 14-3-3 zeta                                                     | Ywhaz     | gi 6756041       | 28       | 7               | 30               | 100                    |
| 95*              | Calcium/calmodulin-dependent protein kinase II gamma isoform 1  | Camk2g    | gi 75991700      | 60       | 5               | 9                | 100                    |
|                  | Calcium/calmodulin-dependent protein kinase II gamma isoform 2  |           | gi 85362729      | 56       |                 | 10               |                        |
|                  | Calcium/calmodulin-dependent protein kinase II gamma isoform 3  |           | gi 85362742      | 58       |                 | 10               |                        |
| 96               | Calcium/calmodulin-dependent protein kinase II, beta            | Camk2b    | gi 31982483      | 60       | 8               | 14               | 100                    |
| 97               | Calcium/calmodulin-dependent protein kinase II, delta isoform 1 | Camk2d    | gi 70906479      | 58       | 2               | 4                | 100                    |
| 98               | Epidermal growth factor receptor pathway substrate 15, related  | Eps15l1   | gi 6679669       | 99       | 2               | 2                | 100                    |
| 99               | Interleukin 17 receptor                                         | Il17ra    | gi 6680411       | 98       | 2               | 4                | 98                     |
| 100              | Latrophilin 1                                                   | Lphn1     | gi 56118951      | 139      | 2               | 2                | 100                    |
| 101              | MAP/microtubule affinity-regulating kinase 1                    | Mark1     | gi 21704014      | 89       | 2               | 3                | 98                     |

| No.                                    | Protein                                                                                                                                                                                                                                                                                 | Gene Name                                                                                                                                                        | Accession Number                                                                                                                                                                                            | MW (kDa) | Unique Peptides | Percent Coverage | Protein ID probability |
|----------------------------------------|-----------------------------------------------------------------------------------------------------------------------------------------------------------------------------------------------------------------------------------------------------------------------------------------|------------------------------------------------------------------------------------------------------------------------------------------------------------------|-------------------------------------------------------------------------------------------------------------------------------------------------------------------------------------------------------------|----------|-----------------|------------------|------------------------|
| 102                                    | Olfactory receptor 1122                                                                                                                                                                                                                                                                 | Olf1122                                                                                                                                                          | gi 22128887                                                                                                                                                                                                 | 37       | 2               | 7                | 99                     |
| 103                                    | Postsynaptic density protein 95                                                                                                                                                                                                                                                         | Dlg4                                                                                                                                                             | gi 6681195                                                                                                                                                                                                  | 80       | 3               | 5                | 99                     |
| 104                                    | Protein phosphatase 1, regulatory subunit 9A                                                                                                                                                                                                                                            | Ppp1r9a                                                                                                                                                          | gi 31711997                                                                                                                                                                                                 | 123      | 3               | 2                | 100                    |
| 105                                    | Protein phosphatase 1, regulatory subunit 9B                                                                                                                                                                                                                                            | Ppp1r9b                                                                                                                                                          | gi 50053703                                                                                                                                                                                                 | 90       | 11              | 16               | 100                    |
| 106                                    | Retinoid X receptor alpha                                                                                                                                                                                                                                                               | Rxra                                                                                                                                                             | gi 6755384                                                                                                                                                                                                  | 51       | 2               | 5                | 100                    |
| <b>Nucleic acid/protein processing</b> |                                                                                                                                                                                                                                                                                         |                                                                                                                                                                  |                                                                                                                                                                                                             |          |                 |                  |                        |
| 107                                    | B-cell leukemia/lymphoma 11B isoform b                                                                                                                                                                                                                                                  | Bcl11b                                                                                                                                                           | gi 120586999                                                                                                                                                                                                | 87       | 2               | 4                | 98                     |
| 108                                    | cAMP-regulated guanine nucleotide exchange factor II                                                                                                                                                                                                                                    | Rapgef4                                                                                                                                                          | gi 9790087                                                                                                                                                                                                  | 113      | 2               | 2                | 100                    |
| 109                                    | DEAD (Asp-Glu-Ala-Asp) box polypeptide 1                                                                                                                                                                                                                                                | Ddx1                                                                                                                                                             | gi 19527256                                                                                                                                                                                                 | 83       | 2               | 2                | 99                     |
| 110                                    | DEAH (Asp-Glu-Ala-His) box polypeptide 15 isoform 2                                                                                                                                                                                                                                     | Dhx15                                                                                                                                                            | gi 110835723                                                                                                                                                                                                | 91       | 2               | 2                | 99                     |
| 111                                    | DEAH (Asp-Glu-Ala-His) box polypeptide 36                                                                                                                                                                                                                                               | Dhx36                                                                                                                                                            | gi 30794390                                                                                                                                                                                                 | 114      | 2               | 2                | 98                     |
| 112                                    | Elongation factor Tu GTP binding domain containing 2                                                                                                                                                                                                                                    | Eftud2                                                                                                                                                           | gi 6755594                                                                                                                                                                                                  | 109      | 2               | 3                | 100                    |
| 113                                    | Eukaryotic translation elongation factor 1 alpha 1                                                                                                                                                                                                                                      | Eef1a1                                                                                                                                                           | gi 126032329                                                                                                                                                                                                | 50       | 4               | 8                | 100                    |
| 114*                                   | H3 histone, family 2 isoform 2<br>H3 histone, family 3A<br>H3 histone, family 3B<br>Histone 1, H3a<br>Histone 1, H3b<br>Histone 1, H3c<br>Histone 1, H3d<br>Histone 1, H3e<br>Histone 1, H3f<br>Histone 1, H3g<br>Histone 1, H3h<br>Histone 1, H3i<br>Histone 2, H3b<br>Histone 2, H3c2 | Hist2h3c1<br>H3f3a<br>H3f3b<br>Hist1h3a<br>Hist1h3b<br>Hist1h3c<br>Hist1h3d<br>Hist1h3e<br>Hist1h3f<br>Hist1h3g<br>Hist1h3h<br>Hist1h3i<br>Hist2h3b<br>Hist2h3c2 | gi 30061401<br>gi 6680159<br>gi 6680161<br>gi 32880233<br>gi 30061339<br>gi 30089712<br>gi 30061337<br>gi 30061341<br>gi 7305139<br>gi 21489955<br>gi 30061343<br>gi 30061345<br>gi 30061347<br>gi 21489953 | 20<br>15 | 4               | 16<br>21         | 100                    |

| No.  | Protein                                                                                                                                                                                                                                                                                                                                                                | Gene Name                                                                                                                                                                                                     | Accession Number                                                                                                                                                                                                                                          | MW (kDa)                                                                                         | Unique Peptides | Percent Coverage                                                                                     | Protein ID probability |
|------|------------------------------------------------------------------------------------------------------------------------------------------------------------------------------------------------------------------------------------------------------------------------------------------------------------------------------------------------------------------------|---------------------------------------------------------------------------------------------------------------------------------------------------------------------------------------------------------------|-----------------------------------------------------------------------------------------------------------------------------------------------------------------------------------------------------------------------------------------------------------|--------------------------------------------------------------------------------------------------|-----------------|------------------------------------------------------------------------------------------------------|------------------------|
| 115  | Heat shock protein 1 (chaperonin)                                                                                                                                                                                                                                                                                                                                      | Hspd1                                                                                                                                                                                                         | gi 31981679                                                                                                                                                                                                                                               | 61                                                                                               | 2               | 3                                                                                                    | 100                    |
| 116  | Heat shock protein 8                                                                                                                                                                                                                                                                                                                                                   | Hspa8                                                                                                                                                                                                         | gi 31981690                                                                                                                                                                                                                                               | 71                                                                                               | 20              | 32                                                                                                   | 100                    |
| 117  | Heterogeneous nuclear ribonucleoprotein M                                                                                                                                                                                                                                                                                                                              | Hnrnrm                                                                                                                                                                                                        | gi 21313308                                                                                                                                                                                                                                               | 78                                                                                               | 6               | 10                                                                                                   | 100                    |
| 118* | Histone 1, H2aa<br>Histone 1, H2ab<br>Histone 1, H2ac<br>Histone 1, H2ad<br>Histone 1, H2ae<br>Histone 1, H2af<br>Histone 1, H2ag<br>Histone 1, H2ah<br>Histone 1, H2ai<br>Histone 1, H2ak<br>Histone 1, H2an<br>Histone 1, H2ao<br>Histone 2, H2aa1<br>H2A histone family, member J<br>H2A histone family, member Z<br>Histone 3, H2a<br>H2A histone family, member X | Hist1h2aa<br>Hist1h2ab<br>Hist1h2ac<br>Hist1h2ad<br>Hist1h2ae<br>Hist1h2af<br>Hist1h2ag<br>Hist1h2ah<br>Hist1h2ai<br>Hist1h2ak<br>Hist1h2an<br>Hist1h2ao<br>Hist2h2aa1<br>H2afj<br>H2afz<br>Hist3h2a<br>H2afx | gi 28316756<br>gi 87299611<br>gi 30061363<br>gi 30061357<br>gi 30061367<br>gi 30061379<br>gi 30061361<br>gi 30061327<br>gi 30061393<br>gi 30061371<br>gi 30061365<br>gi 30061375<br>gi 20799907<br>gi 29244126<br>gi 7949045<br>gi 30061353<br>gi 7106331 | 14<br><br><br><br><br><br><br><br><br><br><br><br><br><br><br><br><br><br><br><br><br><br><br>15 | 2               | 12<br><br><br><br><br><br><br><br><br><br><br><br><br><br><br><br><br><br><br><br><br><br><br><br>11 | 100                    |
| 119  | Histone 1, H2bh                                                                                                                                                                                                                                                                                                                                                        | Hist1h2bh                                                                                                                                                                                                     | gi 30061387                                                                                                                                                                                                                                               | 14                                                                                               | 2               | 19                                                                                                   | 100                    |

| No.  | Protein                                                                                                                                                                                                  | Gene Name                                                                                                                      | Accession Number                                                                                                                                                  | MW (kDa) | Unique Peptides | Percent Coverage | Protein ID probability |
|------|----------------------------------------------------------------------------------------------------------------------------------------------------------------------------------------------------------|--------------------------------------------------------------------------------------------------------------------------------|-------------------------------------------------------------------------------------------------------------------------------------------------------------------|----------|-----------------|------------------|------------------------|
| 120* | Histone 1, H4a<br>Histone 1, H4b<br>Histone 1, H4c<br>Histone 1, H4d<br>Histone 1, H4f<br>Histone 1, H4h<br>Histone 1, H4i<br>Histone 1, H4j<br>Histone 1, H4k<br>Histone cluster 2, H4<br>Histone 4, H4 | Hist1h4a<br>Hist1h4b<br>Hist1h4c<br>Hist1h4d<br>Hist1h4f<br>Hist1h4h<br>Hist1h4i<br>Hist1h4j<br>Hist1h4k<br>Hist2h4<br>Hist4h4 | gi 30061403<br>gi 30061405<br>gi 30061349<br>gi 30089714<br>gi 30061355<br>gi 23943922<br>gi 46430493<br>gi 30061351<br>gi 30061359<br>gi 21361209<br>gi 28316746 | 11       | 6               | 49               | 100                    |
| 121  | Ligase III, DNA, ATP-dependent                                                                                                                                                                           | Lig3                                                                                                                           | gi 71061470                                                                                                                                                       | 113      | 2               | 2                | 100                    |
| 122  | Matrin 3                                                                                                                                                                                                 | Matr3                                                                                                                          | gi 25141233                                                                                                                                                       | 95       | 9               | 12               | 100                    |
| 123  | Nuclease sensitive element binding protein 1                                                                                                                                                             | Ybx1                                                                                                                           | gi 113205059                                                                                                                                                      | 36       | 3               | 12               | 100                    |
| 124  | Poly (ADP-ribose) polymerase family, member 1                                                                                                                                                            | Parp1                                                                                                                          | gi 20806109                                                                                                                                                       | 113      | 12              | 13               | 100                    |
| 125  | Poly A binding protein, cytoplasmic 1                                                                                                                                                                    | Pabpc1                                                                                                                         | gi 31560656                                                                                                                                                       | 71       | 8               | 16               | 100                    |
| 126  | Poly A binding protein, cytoplasmic 2                                                                                                                                                                    | Pabpc2                                                                                                                         | gi 6754972                                                                                                                                                        | 69       | 5               | 8                | 100                    |
| 127  | Ribosomal protein L23                                                                                                                                                                                    | Rpl23                                                                                                                          | gi 12584986                                                                                                                                                       | 15       | 2               | 18               | 100                    |
| 128  | Ribosomal protein S4, X-linked                                                                                                                                                                           | Rps4x                                                                                                                          | gi 6677805                                                                                                                                                        | 30       | 2               | 11               | 100                    |
| 129  | RNA binding motif protein 14                                                                                                                                                                             | Rbm14                                                                                                                          | gi 86262142                                                                                                                                                       | 69       | 3               | 5                | 100                    |
| 130  | U5 snRNP-specific protein                                                                                                                                                                                | Snrmp200                                                                                                                       | gi 40018610                                                                                                                                                       | 245      | 3               | 1                | 100                    |

| No. | Protein                                                                               | Gene Name | Accession Number | MW (kDa) | Unique Peptides | Percent Coverage | Protein ID probability |
|-----|---------------------------------------------------------------------------------------|-----------|------------------|----------|-----------------|------------------|------------------------|
|     | <b>Metabolism</b>                                                                     |           |                  |          |                 |                  |                        |
| 131 | ATP synthase, H <sup>+</sup> transporting, mitochondrial F1 complex, alpha subunit    | Atp5a1    | gi 6680748       | 60       | 24              | 53               | 100                    |
| 132 | ATP synthase, H <sup>+</sup> transporting, mitochondrial F1 complex, gamma subunit    | Atp5c1    | gi 11602916      | 33       | 3               | 11               | 100                    |
| 133 | ATPase, Ca <sup>++</sup> transporting, cardiac muscle, slow twitch 2                  | Atp2a2    | gi 6806903       | 110      | 3               | 4                | 100                    |
| 134 | ATPase, H <sup>+</sup> transporting, lysosomal V1 subunit A                           | Atp6v1a   | gi 31560731      | 68       | 3               | 6                | 100                    |
| 135 | N-acetyltransferase 12                                                                | Nat12     | gi 124487477     | 40       | 2               | 10               | 98                     |
| 136 | Nuclear VCP-like                                                                      | Nvl       | gi 33468981      | 94       | 2               | 4                | 100                    |
|     | <b>Others</b>                                                                         |           |                  |          |                 |                  |                        |
| 137 | Green fluorescent protein                                                             | GFP       | gi 115291372     | 29       | 9               | 31               | 100                    |
| 138 | Inner membrane protein, mitochondrial                                                 | Immt      | gi 70608131      | 84       | 17              | 24               | 100                    |
| 139 | LEM domain containing 2                                                               | Lemd2     | gi 22122563      | 31       | 2               | 8                | 99                     |
| 140 | Prestin                                                                               | Slc26a5   | gi 28933459      | 81       | 2               | 3                | 100                    |
| 141 | Sorting and assembly machinery component 50 homolog                                   | Samm50    | gi 30519943      | 52       | 2               | 5                | 100                    |
| 142 | Sterile alpha and TIR motif containing 1                                              | Sarm1     | gi 40254247      | 80       | 2               | 3                | 99                     |
| 143 | WD repeat domain 37 isoform a                                                         | Wdr37     | gi 27369593      | 55       | 2               | 5                | 99                     |
| 144 | WD repeat domain 47                                                                   | Wdr47     | gi 31088910      | 102      | 2               | 2                | 100                    |
| 145 | PREDICTED: ATP-binding cassette, sub-family A (ABC1), member 12 isoform 3             | Abca12    | gi 149233925     | 292      | 2               | 2                | 98                     |
| 146 | PREDICTED: similar to Bifunctional aminoacyl-tRNA synthetase                          |           | gi 94364712      | 166      | 2               | 1                | 99                     |
| 147 | PREDICTED: similar to Calcium/calmodulin-dependent protein kinase type II gamma chain |           | gi 149265235     | 68       | 4               | 6                | 100                    |

| No. | Protein                                               | Gene Name | Accession Number | MW (kDa) | Unique Peptides | Percent Coverage | Protein ID probability |
|-----|-------------------------------------------------------|-----------|------------------|----------|-----------------|------------------|------------------------|
| 148 | PREDICTED: similar to Ina protein                     |           | gi 149270717     | 49       | 27              | 52               | 100                    |
| 149 | PREDICTED: similar to l-Afadin isoform 4              | Mllt4     | gi 149268963     | 209      | 2               | 1                | 99                     |
| 150 | PREDICTED: similar to lysyl-tRNA synthetase isoform 1 |           | gi 82916992      | 68       | 5               | 8                | 100                    |
| 151 | PREDICTED: similar to protocadherin                   |           | gi 149269983     | 88       | 2               | 3                | 98                     |
| 152 | Hypothetical protein 4732456N10                       |           | gi 29244176      | 58       | 2               | 4                | 100                    |
| 153 | Hypothetical protein LOC380768                        |           | gi 56606029      | 80       | 3               | 4                | 100                    |
| 154 | Hypothetical protein LOC67412                         |           | gi 120953219     | 103      | 3               | 4                | 100                    |

\*: Proteins that contained similar peptides and could not be differentiated based on MS/MS analysis alone.

## Supplementary Table S2

### Comparison of Pcdh-associated proteins with PSD components identified in proteomic studies

#### References:

44. Witzmann FA, Arnold RJ, Bai F, Hrcirova P, Kimpel MW, et al. (2005) A proteomic survey of rat cerebral cortical synaptosomes. *Proteomics* 5: 2177-2201.
45. Trinidad JC, Thalhammer A, Specht CG, Lynn AJ, Baker PR, et al. (2008) Quantitative analysis of synaptic phosphorylation and protein expression. *Mol Cell Proteomics* 7: 684-696.
47. Jordan BA, Fernholz BD, Boussac M, Xu C, Grigorean G, et al. (2004) Identification and verification of novel rodent postsynaptic density proteins. *Mol Cell Proteomics* 3: 857-871.
48. Dosemeci A, Makusky AJ, Jankowska-Stephens E, Yang X, Slotta DJ, et al. (2007) Composition of the synaptic PSD-95 complex. *Mol Cell Proteomics* 6: 1749-1760.
49. Collins MO, Husi H, Yu L, Brandon JM, Anderson CN, et al. (2006) Molecular characterization and comparison of the components and multiprotein complexes in the postsynaptic proteome. *J Neurochem* 97 Suppl 1: 16-23.
50. Cheng D, Hoogenraad CC, Rush J, Ramm E, Schlager MA, et al. (2006) Relative and absolute quantification of postsynaptic density proteome isolated from rat forebrain and cerebellum. *Mol Cell Proteomics* 5: 1158-1170.

| Protein                                                                | Gene Name | Accession Number | Cheng et al | Trinidad et al | Jordan et al | Dosemeci et al | Witzmann et al | Collins et al |
|------------------------------------------------------------------------|-----------|------------------|-------------|----------------|--------------|----------------|----------------|---------------|
| 14-3-3 gamma                                                           | Ywhag     | gi 21464101      | -           | -              | +            | +              | -              | +             |
| 14-3-3 theta                                                           | Ywhaq     | gi 6756039       | +           | -              | +            | +              | +              | +             |
| 14-3-3 zeta                                                            | Ywhaz     | gi 6756041       | +           | -              | +            | +              | +              | +             |
| Actin, beta, cytoplasmic                                               | Actb      | gi 6671509       | +           | +              | +            | +              | -              | +             |
| Actin-binding LIM protein 1                                            | Ablim1    | gi 38016178      | +           | +              | +            | -              | -              | +             |
| Adaptor protein complex AP-2, alpha 1 subunit isoform b                | Ap2a1     | gi 116256510     | +           | +              | +            | +              | -              | +             |
| Adaptor protein complex AP-2, alpha 2 subunit                          | Ap2a2     | gi 40254646      | +           | +              | +            | +              | +              | +             |
| Adaptor-related protein complex 2, beta 1 subunit isoform b            | Ap2b1     | gi 21313640      | +           | +              | +            | +              | +              | +             |
| Ankyrin 2, brain isoform 2                                             | Ank2      | gi 77681962      | +           | +              | +            | +              | -              | +             |
| ATP synthase, H+ transporting, mitochondrial F1 complex, alpha subunit | Atp5a1    | gi 6680748       | -           | +              | +            | +              | +              | +             |
| ATP synthase, H+ transporting, mitochondrial F1 complex, gamma subunit | Atp5c1    | gi 11602916      | +           | +              | +            | -              | +              | +             |
| ATPase, Ca++ transporting, cardiac muscle, slow twitch 2               | Atp2a2    | gi 6806903       | +           | +              | -            | +              | -              | +             |
| ATPase, H+ transporting, lysosomal V1 subunit A                        | Atp6v1a   | gi 31560731      | +           | +              | +            | +              | -              | +             |
| ATP-binding cassette transporter sub-family A member 16                | Abca16    | gi 46369473      | -           | -              | -            | -              | -              | -             |
| ATP-binding cassette transporter sub-family A member 9                 | Abca9     | gi 22267466      | -           | -              | -            | -              | -              | -             |
| B-cell leukemia/lymphoma 11B isoform b                                 | Bcl11b    | gi 120586999     | -           | -              | -            | -              | -              | -             |
| Cadherin 4 (R-cadherin)                                                | Cdh4      | gi 6753376       | -           | -              | +            | -              | -              | -             |
| Calcium/calmodulin-dependent protein kinase II gamma                   | Camk2g    | gi 75991700      | +           | +              | +            | +              | +              | +             |
| Calcium/calmodulin-dependent protein kinase II, beta                   | Camk2b    | gi 31982483      | +           | +              | +            | +              | +              | +             |
| Calcium/calmodulin-dependent protein kinase II, delta isoform 1        | Camk2d    | gi 70906479      | +           | +              | +            | +              | +              | +             |
| cAMP-regulated guanine nucleotide exchange factor II                   | Rapgef4   | gi 9790087       | -           | -              | +            | +              | -              | +             |
| Capping protein (actin filament) muscle Z-line, beta isoform b         | Capzb     | gi 6753262       | -           | +              | +            | +              | -              | +             |
| Catenin, alpha 1                                                       | Cttna1    | gi 6753294       | +           | +              | +            | +              | -              | +             |
| Catenin, alpha 2 isoform 2                                             | Cttna2    | gi 6753296       | +           | +              | +            | +              | -              | +             |
| Catenin, beta 1                                                        | Cttnb1    | gi 6671684       | +           | +              | +            | +              | -              | +             |
| CLASP1                                                                 | Clasp1    | gi 124486879     | -           | +              | -            | -              | -              | -             |
| Clathrin interactor 1                                                  | Clint1    | gi 113865873     | -           | -              | -            | -              | -              | -             |
| Clathrin, heavy polypeptide (Hc)                                       | Cltc      | gi 51491845      | +           | +              | +            | -              | +              | +             |
| CLIP-associating protein CLASP2 isoform a                              | Clasp2    | gi 126506304     | -           | +              | +            | +              | -              | +             |
| DEAD (Asp-Glu-Ala-Asp) box polypeptide 1                               | Ddx1      | gi 19527256      | -           | +              | +            | +              | -              | +             |
| DEAH (Asp-Glu-Ala-His) box polypeptide 15 isoform 2                    | Dhx15     | gi 110835723     | -           | +              | -            | -              | -              | -             |
| DEAH (Asp-Glu-Ala-His) box polypeptide 36                              | Dhx36     | gi 30794390      | -           | -              | -            | -              | -              | -             |
| Drebrin 1                                                              | Dbn1      | gi 34328251      | +           | -              | +            | -              | -              | +             |
| EF hand domain containing 2                                            | Efhd2     | gi 31981086      | -           | -              | -            | -              | -              | -             |
| ELKS/RAB6-interacting/CAST family member 2                             | Erc2      | gi 37360977      | -           | +              | -            | +              | -              | +             |
| Elongation factor Tu GTP binding domain containing 2                   | Eftud2    | gi 6755594       | -           | -              | -            | -              | -              | -             |
| Epidermal growth factor receptor pathway substrate 15, related         | Eps15l1   | gi 6679669       | -           | +              | -            | +              | -              | +             |
| Eukaryotic translation elongation factor 1 alpha 1                     | Eef1a1    | gi 126032329     | -           | +              | +            | +              | -              | +             |
| FXYD domain-containing ion transport regulator 2                       | Fxyd2     | gi 16554570      | -           | -              | -            | -              | -              | -             |
| H3 histone, family 3B                                                  | H3f3b     | gi 6680161       | -           | -              | -            | -              | -              | -             |



|                                                          |           |              |   |   |   |   |   |   |
|----------------------------------------------------------|-----------|--------------|---|---|---|---|---|---|
| Heat shock protein 1 (chaperonin)                        | Hspd1     | gi 31981679  | - | + | - | + | - | + |
| Heat shock protein 8                                     | Hspa8     | gi 31981690  | - | + | + | + | - | + |
| Heterogeneous nuclear ribonucleoprotein M                | Hnrnmp    | gi 21313308  | - | + | - | - | - | - |
| Histone 1, H2aa                                          | Hist1h2aa | gi 28316756  | - | - | - | - | - | - |
| Histone 1, H2bh                                          | Hist1h2bh | gi 30061387  | - | - | + | - | - | - |
| Histone 1, H4b                                           | Hist1h4b  | gi 30061405  | - | - | + | - | - | - |
| Inner membrane protein, mitochondrial                    | Immt      | gi 70608131  | - | + | + | + | - | + |
| Interleukin 17 receptor                                  | Il17ra    | gi 6680411   | - | - | - | - | - | - |
| Internexin neuronal intermediate filament protein, alpha | Ina       | gi 34328368  | + | + | + | + | - | + |
| Kinesin family member 2A                                 | Kif2a     | gi 6680560   | + | + | - | - | - | - |
| Lamin B2                                                 | Lmnb2     | gi 113195686 | + | + | - | - | - | - |
| Latrophilin 1                                            | Lphn1     | gi 56118951  | + | + | - | + | - | + |
| LEM domain containing 2                                  | Lemd2     | gi 22122563  | - | - | - | - | - | - |
| Ligase III, DNA, ATP-dependent                           | Lig3      | gi 71061470  | - | - | - | - | - | - |
| Limbic system-associated membrane protein                | Lsamp     | gi 30425330  | + | - | - | - | - | + |
| MAP/microtubule affinity-regulating kinase 1             | Mark1     | gi 21704014  | - | + | + | - | - | - |
| Matrin 3                                                 | Matr3     | gi 25141233  | - | + | - | - | - | - |
| Microtubule-associated protein 1 B                       | Mtap1b    | gi 6678946   | + | + | + | - | + | - |
| Microtubule-associated protein tau                       | Mapt      | gi 84370347  | - | + | + | + | + | + |
| Myosin heavy chain 10, non-muscle                        | Myh10     | gi 33598964  | + | - | + | + | - | + |
| Myosin IB                                                | Myo1b     | gi 86990450  | - | + | + | - | - | + |
| Myosin Va                                                | Myo5a     | gi 115511052 | + | + | + | + | - | + |
| Myosin Vb                                                | Myo5b     | gi 46399202  | + | + | + | - | - | - |
| Myosin XVIIIa                                            | Myo18a    | gi 22094119  | + | + | + | - | - | + |
| Myosin, heavy polypeptide 14                             | Myh14     | gi 29336026  | - | + | - | + | - | + |
| Myosin, heavy polypeptide 9, non-muscle isoform 1        | Myh9      | gi 114326446 | - | + | + | + | - | + |
| Myosin, light polypeptide 6B                             | Myl6b     | gi 26986555  | + | + | - | - | - | - |
| N-acetyltransferase 12                                   | Nat12     | gi 124487477 | - | - | - | - | - | - |
| Neurofilament 3, medium                                  | Nefn      | gi 112363107 | - | - | + | - | - | - |
| Neurofilament, light polypeptide                         | Nefl      | gi 39204499  | - | + | + | + | - | + |
| Nuclear VCP-like                                         | Nvl       | gi 33468981  | - | - | - | - | - | - |
| Nuclease sensitive element binding protein 1             | Ybx1      | gi 113205059 | - | - | - | - | - | - |
| Olfactory receptor 1122                                  | Olf1122   | gi 22128887  | - | - | - | - | - | - |
| Poly (ADP-ribose) polymerase family, member 1            | Parp1     | gi 20806109  | - | + | - | - | - | - |
| Poly A binding protein, cytoplasmic 1                    | Pabpc1    | gi 31560656  | - | - | - | + | - | + |
| Poly A binding protein, cytoplasmic 2                    | Pabpc2    | gi 6754972   | - | - | - | - | - | - |
| Postsynaptic density protein 95                          | Dlg4      | gi 6681195   | + | - | + | + | + | + |
| Prestin                                                  | Slc26a5   | gi 28933459  | - | - | - | - | - | - |
| Protein phosphatase 1, regulatory subunit 9A             | Ppp1r9a   | gi 31711997  | - | + | + | + | - | + |
| Protein phosphatase 1, regulatory subunit 9B             | Ppp1r9b   | gi 50053703  | - | + | + | + | - | + |
| Rab11-family interacting protein 2                       | Rab11fip2 | gi 75677518  | - | + | + | - | - | + |

|                                                     |          |              |   |   |   |   |   |   |
|-----------------------------------------------------|----------|--------------|---|---|---|---|---|---|
| Rab6-interacting protein 2 isoform 1                | Erc1     | gi 120300971 | + | - | + | - | - | - |
| Retinoid X receptor alpha                           | Rxra     | gi 6755384   | - | - | - | - | - | - |
| Ribosomal protein L23                               | Rpl23    | gi 12584986  | + | + | + | + | - | + |
| Ribosomal protein S4, X-linked                      | Rps4x    | gi 6677805   | + | + | - | - | - | + |
| RNA binding motif protein 14                        | Rbm14    | gi 86262142  | - | + | - | - | - | + |
| Snap-25-interacting protein                         | P140     | gi 116089329 | + | - | + | + | - | + |
| Solute carrier family 25, member 12                 | Slc25a12 | gi 27369581  | - | - | + | + | - | + |
| Solute carrier family 25, member 4 (Ant1)           | Slc25a4  | gi 91680541  | + | + | + | + | - | + |
| Solute carrier family 25, member 5 (Ant2)           | Slc25a5  | gi 22094075  | + | + | + | + | - | + |
| Sorting and assembly machinery component 50 homolog | Samm50   | gi 30519943  | - | + | - | - | - | - |
| Spectrin alpha 2                                    | Spna2    | gi 115496850 | + | + | + | + | + | + |
| Spectrin beta 1                                     | Spnb1    | gi 84490394  | + | + | + | - | - | + |
| Spectrin beta 2 isoform 1                           | Spnb2    | gi 117938332 | + | + | + | + | - | + |
| Spectrin beta 3                                     | Spnb3    | gi 55926127  | + | + | + | - | - | + |
| Sterile alpha and TIR motif containing 1            | Sarm1    | gi 40254247  | - | - | - | - | - | - |
| Synaptic vesicle glycoprotein 2 a                   | Sv2a     | gi 11528518  | - | + | - | - | - | - |
| Transportin 1 isoform 1                             | Tnpo1    | gi 115385968 | - | - | - | - | - | - |
| Tubulin, alpha 1                                    | Tuba1a   | gi 6755901   | + | - | + | + | - | + |
| Tubulin, alpha 1a                                   | Tuba3a   | gi 6678465   | + | - | + | + | - | + |
| Tubulin, alpha 1B                                   | Tuba1b   | gi 34740335  | + | + | + | + | - | + |
| Tubulin, alpha 1C                                   | Tuba1c   | gi 6678469   | + | - | + | + | - | + |
| Tubulin, alpha 4                                    | Tuba4a   | gi 6678467   | + | - | + | + | - | + |
| Tubulin, beta                                       | Tubb2b   | gi 21746161  | + | + | + | + | + | + |
| Tubulin, beta 2                                     | Tubb2a   | gi 33859488  | + | - | + | + | + | + |
| Tubulin, beta 2c                                    | Tubb2c   | gi 22165384  | + | + | + | + | + | + |
| Tubulin, beta 3                                     | Tubb3    | gi 12963615  | - | + | + | + | + | + |
| Tubulin, beta 4                                     | Tubb4    | gi 31981939  | - | + | + | + | + | + |
| Tubulin, beta 5                                     | Tubb5    | gi 7106439   | + | - | + | + | + | + |
| Tubulin, beta 6                                     | Tubb6    | gi 27754056  | + | + | + | + | + | + |
| U5 snRNP-specific protein                           | Snrnp200 | gi 40018610  | - | - | - | - | - | - |
| Vimentin                                            | Vim      | gi 31982755  | - | + | + | + | - | + |
| WD repeat domain 37 isoform a                       | Wdr37    | gi 27369593  | - | + | - | + | - | + |
| WD repeat domain 47                                 | Wdr47    | gi 31088910  | - | + | - | - | - | + |
